# Supplementary material for: Fungal Community in Antarctic Soil Along the Retreating Collins Glacier (Fildes Peninsula, King George Island)
Source: PubMed Central journal article supplement (PMC7465374; doi:10.3390/microorganisms8081145), 2020-07-29
Supplement: microorganisms-08-01145-s001.pdf [file microorganisms-08-01145-s001.pdf]

## *Supplementary Material*

**Table S1.** Data for the soil samples collected at Collins Glacier (Fildes Peninsula, South Shetlands Archipelago, King George Island, Maritime Antarctica).

| Site (meters) | Geographic coordinate     | Average T (°C) |
|---------------|---------------------------|----------------|
| 0             | 62° 09.821'S 58° 55.373'W | 0.9            |
| 3             | 62° 09.821'S 58° 55.377'W | 5.1            |
| 50            | 62° 09.821'S 58° 55.373'W | 2.7            |
| 100           | 62° 09.804'S 58° 55.506'W | 3.9            |
| 150           | 62° 09.794'S 58° 55.560'W | 3.6            |
| 200           | 62° 09.790'S 58° 55.599'W | 4.9            |
| 250           | 62° 09.782'S 58° 55.658'W | 4.5            |
| 300           | 62° 09.776'S 58° 55.712'W | 3.5            |
| 350           | 62° 09.766'S 58° 55.771'W | 4.5            |
| 400           | 62° 09.753'S 58° 55.825'W | 4.5            |
| 800           | 62° 09.674'S 58° 56.249'W | 2.5            |

**Table S2.** Physicochemical parameters of the eleven soil samples collected at Collins Glacier (Fildes Peninsula, King George Island, Antarctica).

| Sample (meters) | T°C | pH  | Organic Matter (g.dm <sup>-3</sup> ) | P (mg.dm <sup>-3</sup> ) | K (mmolc.dm <sup>-3</sup> ) | Ca (mmolc.dm <sup>-3</sup> ) | Mg (mmolc.dm <sup>-3</sup> ) | Cu (mg.dm <sup>-3</sup> ) | Fe (mg.dm <sup>-3</sup> ) | Mn (mg.dm <sup>-3</sup> ) | Zn (mg.dm <sup>-3</sup> ) | Silt (g kg <sup>-1</sup> ) | Clay (g kg <sup>-1</sup> ) |
|-----------------|-----|-----|--------------------------------------|--------------------------|-----------------------------|------------------------------|------------------------------|---------------------------|---------------------------|---------------------------|---------------------------|----------------------------|----------------------------|
| 0 m             | 0.9 | 6.1 | 5                                    | 369                      | 11,9                        | 197                          | 101                          | 4.1                       | 67                        | 38.7                      | 0.4                       | 162                        | 52                         |
| 3 m             | 5.1 | 6.1 | 5                                    | 320                      | 9.9                         | 236                          | 110                          | 4.2                       | 64                        | 12.8                      | 0.3                       | 129                        | 52                         |
| 50 m            | 2.7 | 6.1 | 6                                    | 340                      | 7.9                         | 210                          | 125                          | 4.6                       | 45                        | 10.3                      | 0.2                       | 102                        | 82                         |
| 100 m           | 3.9 | 6   | 4                                    | 269                      | 6.7                         | 153                          | 136                          | 2.8                       | 67                        | 4.4                       | 0.4                       | 236                        | 52                         |
| 150 m           | 3.6 | 5.8 | 7                                    | 277                      | 9                           | 170                          | 92                           | 3                         | 66                        | 5.3                       | 0.5                       | 307                        | 78                         |
| 200 m           | 4.9 | 5.7 | 5                                    | 230                      | 7.2                         | 139                          | 103                          | 3.3                       | 54                        | 6.6                       | 0.5                       | 338                        | 156                        |
| 250 m           | 4.5 | 6.1 | 8                                    | 313                      | 8.4                         | 245                          | 98                           | 3.1                       | 35                        | 6.8                       | 0.4                       | 415                        | 78                         |
| 300 m           | 3.5 | 5.7 | 9                                    | 270                      | 6.6                         | 119                          | 81                           | 4.5                       | 77                        | 4                         | 0.6                       | 345                        | 131                        |
| 350 m           | 4.5 | 5.6 | 5                                    | 262                      | 14.8                        | 277                          | 87                           | 2                         | 53                        | 2.3                       | 0.3                       | 181                        | 78                         |
| 400 m           | 4.5 | 5.6 | 6                                    | 257                      | 16.2                        | 470                          | 78                           | 1.6                       | 39                        | 1.7                       | 0.2                       | 125                        | 77                         |
| 800 m           | 2.5 | 5.7 | 17                                   | 274                      | 16.2                        | 266                          | 72                           | 2.2                       | 73                        | 1.5                       | 0.3                       | 174                        | 77                         |

**Table S3.** Taxonomic affiliation of the Antarctic fungi isolated from samples collected at Collins Glacier (Fildes Peninsula, King George Island, Antarctica).

| <b>Fungal identification</b> | <b>BLAST closest relatives</b>               | <b>Accession Number</b> | <b>ID (%)</b> | <b>N° of isolates</b> |
|------------------------------|----------------------------------------------|-------------------------|---------------|-----------------------|
| <i>Oidiodendron</i> sp.      | <i>Oidiodendrontruncatum</i> UAMH 1399       | NR111036                | 99            | 11                    |
| <i>Herpotrichia</i> sp.      | <i>Herpotrichiajuniperi</i> TR_CI_4 18S      | HM853976                | 98            | 7                     |
| <i>Passalora</i> sp.         | <i>Passaloraloranthi</i> C8a8                | JX436780                | 100           | 1                     |
| <i>Pseudeurotium</i> sp1     | <i>Pseudeurotium ovale</i> CBS 389.54        | NR145346                | 98            | 7                     |
| <i>Pseudeurotium</i> sp2     | <i>Pseudeurotiumhygrophilum</i>              | NR111128                | 99            | 15                    |
| <i>Acremonium</i> sp.        | <i>Acremoniumcereale</i> IHBFB 2215          | MF326602                | 99            | 5                     |
| <i>Sarocladium</i> sp.       | <i>Sarocladiumimplicatum</i> CBS 397.70A     | MH859761                | 98            | 3                     |
| <i>Thelebolus</i> sp.        | <i>Thelebolusmicrosporus</i> Ant170          | MG586989                | 100           | 1                     |
| <i>Xylaria</i> sp.           | <i>Xylaria multiplex</i> 1005                | KP133436                | 99            | 1                     |
| <i>Pholiota</i> sp.          | <i>Phliotabaesperma</i> TFB8315              | KY559332                | 99            | 2                     |
| <i>Helotiales</i> sp.        | <i>Helotiales</i> sp. UFMGCB 12371           | MK889360                | 99            | 14                    |
| <i>Schizophyllum</i> sp.     | <i>Schizophyllumcommune</i> CBS 579.83       | MH861655                | 99            | 1                     |
| <i>Gibellulopsis</i> sp.     | <i>Gibellulopsisiscis</i> CBS 892.70         | NR_145354               | 99            | 1                     |
| <i>Mortierella</i> sp1       | <i>Mortierellagamsii</i> CBS 749.68          | NR_152954               | 99            | 3                     |
| <i>Mortierella</i> sp2       | <i>Mortierellaahyalina</i> CBS 223.35        | NR16354                 | 100           | 2                     |
| <i>Mortierella</i> sp3       | <i>Mortierellaantarctica</i> CBS 609.70      | NR111580                | 99            | 8                     |
| <i>Mortierella</i> sp4       | <i>Mortierellaelongatula</i> CBS 488.70      | NR111582                | 95            | 9                     |
| <i>Tricladium</i> sp.        | <i>Tricladiumminutum</i>                     | JQ412863                | 95            | 6                     |
| <i>Cladosporium</i> sp1      | <i>Cladosporiumxantochromaticum</i> CPC11609 | EF679356                | 100           | 2                     |
| <i>Cladosporium</i> sp2      | <i>Cladosporiumhalotolerans</i> CBS 130257   | MH865505                | 100           | 1                     |
| <i>Talaromyces</i> sp.       | <i>Talaromycesfuniculosus</i> CBS 126817     | MH864243                | 100           | 3                     |
| <i>Penicillium</i> sp.       | <i>Penicillium</i> sp. MCCC001               | MN481191                | 100           | 5                     |
| <i>Pseudogymnoascus</i> sp1  | <i>Pseudogymnoascusverrucosus</i> UAMH 10580 | DQ117441                | 99            | 2                     |
| <i>Pseudogymnoascus</i> sp2  | <i>Pseudogymnoascuspannorum</i> CBS 127774   | MH864770                | 99            | 4                     |
| <i>Pseudogymnoascus</i> sp3  | <i>Pseudogymnoascus</i> sp. LW65             | MH128228                | 99            | 84                    |
| <i>Pseudogymnoascus</i> sp4  | <i>Pseudogymnoascuspannorum</i> UAMH 1030    | DQ117436                | 99            | 1                     |
| <i>Pseudogymnoascus</i> sp5  | <i>Pseudogymnoascus</i> sp. CCMGE55          | MH790447                | 99            | 109                   |
| <b>Total</b>                 |                                              |                         |               | <b>309</b>            |

**Table S4.** Number of filamentous fungi isolated per taxa from the Collins Glacier retreated soil samples, using different culture media and two temperature of the incubation.

|                          | 5°C |        |    |     | 15°C |        |    |     |
|--------------------------|-----|--------|----|-----|------|--------|----|-----|
|                          | PDA | PDA10X | MA | BSA | PDA  | PDA10X | MA | BSA |
| <i>Ascomycota</i>        |     |        |    |     |      |        |    |     |
| <i>Pseudogymnoascus</i>  | 24  | 14     | 21 | 15  | 30   | 34     | 33 | 29  |
| <i>Pseudeutorium</i>     | 3   | 1      | 3  | 4   | 1    | 1      | 8  | 1   |
| <i>Tricladium</i>        | 2   | -      | 1  | -   | -    | -      | 3  | -   |
| <i>Oidiodendron</i>      | 1   | 1      | -  | 1   | 2    | 3      | -  | 3   |
| <i>Herpotrichia</i>      | 2   | -      | 2  | -   | 2    | -      | 1  | -   |
| <i>Acremonium</i>        | 3   | -      | -  | -   | 1    | -      | -  | -   |
| <i>Penicillium</i>       | -   | 1      | 1  | 1   | 2    | -      | -  | -   |
| <i>Talaromyces</i>       | -   | -      | -  | -   | 1    | -      | -  | 2   |
| <i>Cladosporium</i>      | -   | -      | -  | 1   | 1    | -      | -  | 1   |
| <i>Sarocladium</i>       | 1   | -      | -  | -   | 1    | -      | -  | 1   |
| <i>Passalora</i>         | -   | -      | -  | 1   | -    | -      | -  | -   |
| <i>Thelebolus</i>        | -   | -      | -  | -   | -    | -      | 1  | -   |
| <i>Xylaria</i>           | -   | -      | -  | -   | -    | -      | 1  | -   |
| <i>Gibellulopsis</i>     | -   | -      | -  | -   | 1    | -      | -  | -   |
| <i>Helotiales</i>        | 4   | 1      | 1  | 2   | 1    | 2      | -  | 3   |
| <i>Basidiomycota</i>     |     |        |    |     |      |        |    |     |
| <i>Schizophyllum</i>     | -   | -      | -  | -   | 1    | -      | -  | -   |
| <i>Pholiota</i>          | -   | -      | -  | 2   | -    | -      | -  | -   |
| <i>Russulales</i>        | -   | -      | -  | -   | 1    | -      | -  | -   |
| <i>Mortierellomycota</i> |     |        |    |     |      |        |    |     |
| <i>Mortierella</i>       | 1   | -      | 3  | -   | 10   | 3      | 4  | 1   |
| Total                    | 41  | 18     | 32 | 28  | 55   | 44     | 50 | 41  |
|                          | 119 |        |    |     | 190  |        |    |     |

**Table S5.** Taxonomic affiliations of the filamentous fungi isolated from the Collins Glacier retreated soil samples

| TAXON                       | Distance from glacier (m) |    |    |     |     |     |     |     |     |     |     | Total      | FR (%) <sup>1</sup> |
|-----------------------------|---------------------------|----|----|-----|-----|-----|-----|-----|-----|-----|-----|------------|---------------------|
|                             | 0                         | 3  | 50 | 100 | 150 | 200 | 250 | 300 | 350 | 400 | 800 |            |                     |
| <b>Ascomycota</b>           |                           |    |    |     |     |     |     |     |     |     |     |            |                     |
| <i>Pseudogymnoascus</i> sp1 | -                         | -  | 1  | 1   | -   | -   | -   | -   | -   | -   | -   | 2          | 0.65                |
| <i>Pseudogymnoascus</i> sp2 | 4                         | -  | -  | -   | -   | -   | -   | -   | -   | -   | -   | 4          | 1.29                |
| <i>Pseudogymnoascus</i> sp3 | 24                        | 23 | 9  | 9   | 6   | 6   | 2   | -   | -   | -   | 5   | 84         | 27.18               |
| <i>Pseudogymnoascus</i> sp4 | -                         | 1  | -  | -   | -   | -   | -   | -   | -   | -   | -   | 1          | 0.32                |
| <i>Pseudogymnoascus</i> sp5 | 5                         | 1  | -  | 2   | 24  | 12  | 10  | 18  | 10  | 8   | 19  | 109        | 35.28               |
| <i>Pseudeutorium</i> sp1    | 5                         | 1  | -  | -   | 1   | -   | -   | -   | -   | -   | -   | 7          | 2.27                |
| <i>Pseudeutorium</i> sp2    | 10                        | 2  | -  | 1   | -   | -   | 1   | -   | -   | -   | 1   | 15         | 4.85                |
| <i>Tricladium</i>           | 4                         | 2  | -  | -   | -   | -   | -   | -   | -   | -   | -   | 6          | 1.94                |
| <i>Oidiodendron</i>         | -                         | -  | -  | -   | 1   | 8   | -   | -   | -   | 2   | -   | 11         | 3.56                |
| <i>Herpotrichia</i>         | -                         | -  | -  | -   | 5   | -   | -   | -   | 2   | -   | -   | 7          | 2.27                |
| <i>Acremonium</i>           | -                         | 5  | -  | -   | -   | -   | -   | -   | -   | -   | -   | 5          | 1.62                |
| <i>Penicillium</i>          | 2                         | -  | -  | -   | 1   | -   | -   | -   | 1   | 1   | -   | 5          | 1.62                |
| <i>Talaromyces</i>          | -                         | -  | -  | -   | 3   | -   | -   | -   | -   | -   | -   | 3          | 0.97                |
| <i>Cladosporium</i> sp1     | -                         | -  | -  | -   | 2   | -   | -   | -   | -   | -   | -   | 2          | 0.65                |
| <i>Cladosporium</i> sp2     | 1                         | -  | -  | -   | -   | -   | -   | -   | -   | -   | -   | 1          | 0.32                |
| <i>Sarocladium</i>          | -                         | 1  | -  | -   | 2   | -   | -   | -   | -   | -   | -   | 3          | 0.97                |
| <i>Passalora</i>            | -                         | -  | -  | 1   | -   | -   | -   | -   | -   | -   | -   | 1          | 0.32                |
| <i>Thelebolus</i>           | -                         | -  | 1  | -   | -   | -   | -   | -   | -   | -   | -   | 1          | 0.32                |
| <i>Xylaria</i>              | -                         | -  | -  | -   | 1   | -   | -   | -   | -   | -   | -   | 1          | 0.32                |
| <i>Gibellulopsis</i>        | -                         | -  | -  | -   | 1   | -   | -   | -   | -   | -   | -   | 1          | 0.32                |
| Helotiales                  | 6                         | 6  | -  | -   | -   | 1   | -   | 1   | -   | -   | -   | 14         | 4.53                |
| <b>Basidiomycota</b>        |                           |    |    |     |     |     |     |     |     |     |     |            |                     |
| <i>Schizophyllum</i>        | -                         | -  | -  | 1   | -   | -   | -   | -   | -   | -   | -   | 1          | 0.32                |
| <i>Pholiota</i>             | -                         | -  | -  | -   | -   | -   | -   | -   | -   | 2   | -   | 2          | 0.65                |
| Russulales                  | -                         | -  | -  | -   | 1   | -   | -   | -   | -   | -   | -   | 1          | 0.32                |
| <b>Mortierellomycota</b>    |                           |    |    |     |     |     |     |     |     |     |     |            |                     |
| <i>Mortierella</i> sp1      | -                         | -  | -  | -   | 1   | -   | -   | -   | -   | 2   | -   | 3          | 0.97                |
| <i>Mortierella</i> sp2      | -                         | -  | 1  | -   | -   | -   | -   | -   | -   | -   | 1   | 2          | 0.65                |
| <i>Mortierella</i> sp3      | -                         | -  | 2  | -   | -   | -   | 2   | 3   | -   | -   | 1   | 8          | 2.59                |
| <i>Mortierella</i> sp4      | -                         | -  | -  | 1   | -   | 2   | 2   | -   | 2   | 2   | -   | 9          | 2.91                |
| Total                       | 61                        | 41 | 15 | 16  | 55  | 29  | 15  | 22  | 14  | 18  | 23  | <b>309</b> | <b>100</b>          |

<sup>1</sup> FR (%) = Relative frequency of isolate.

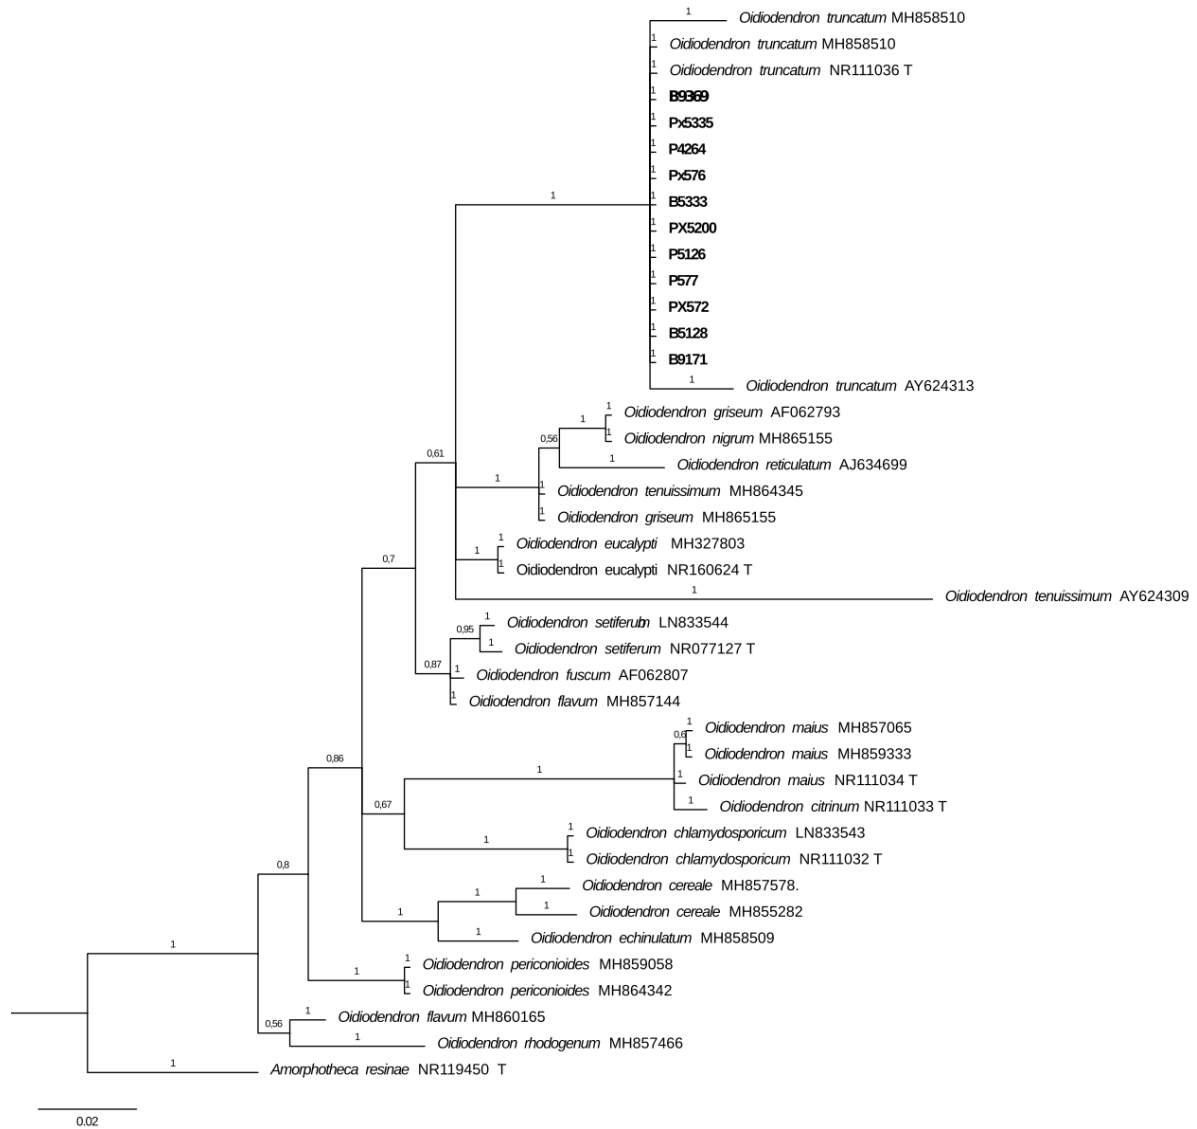

**Figure S1.** Phylogenetic analysis of *Oidiiodendron* species isolated in this study, with sequences of the closest species deposited in GenBank. The tree was built based on the ITS region sequences using Bayesian Inference.

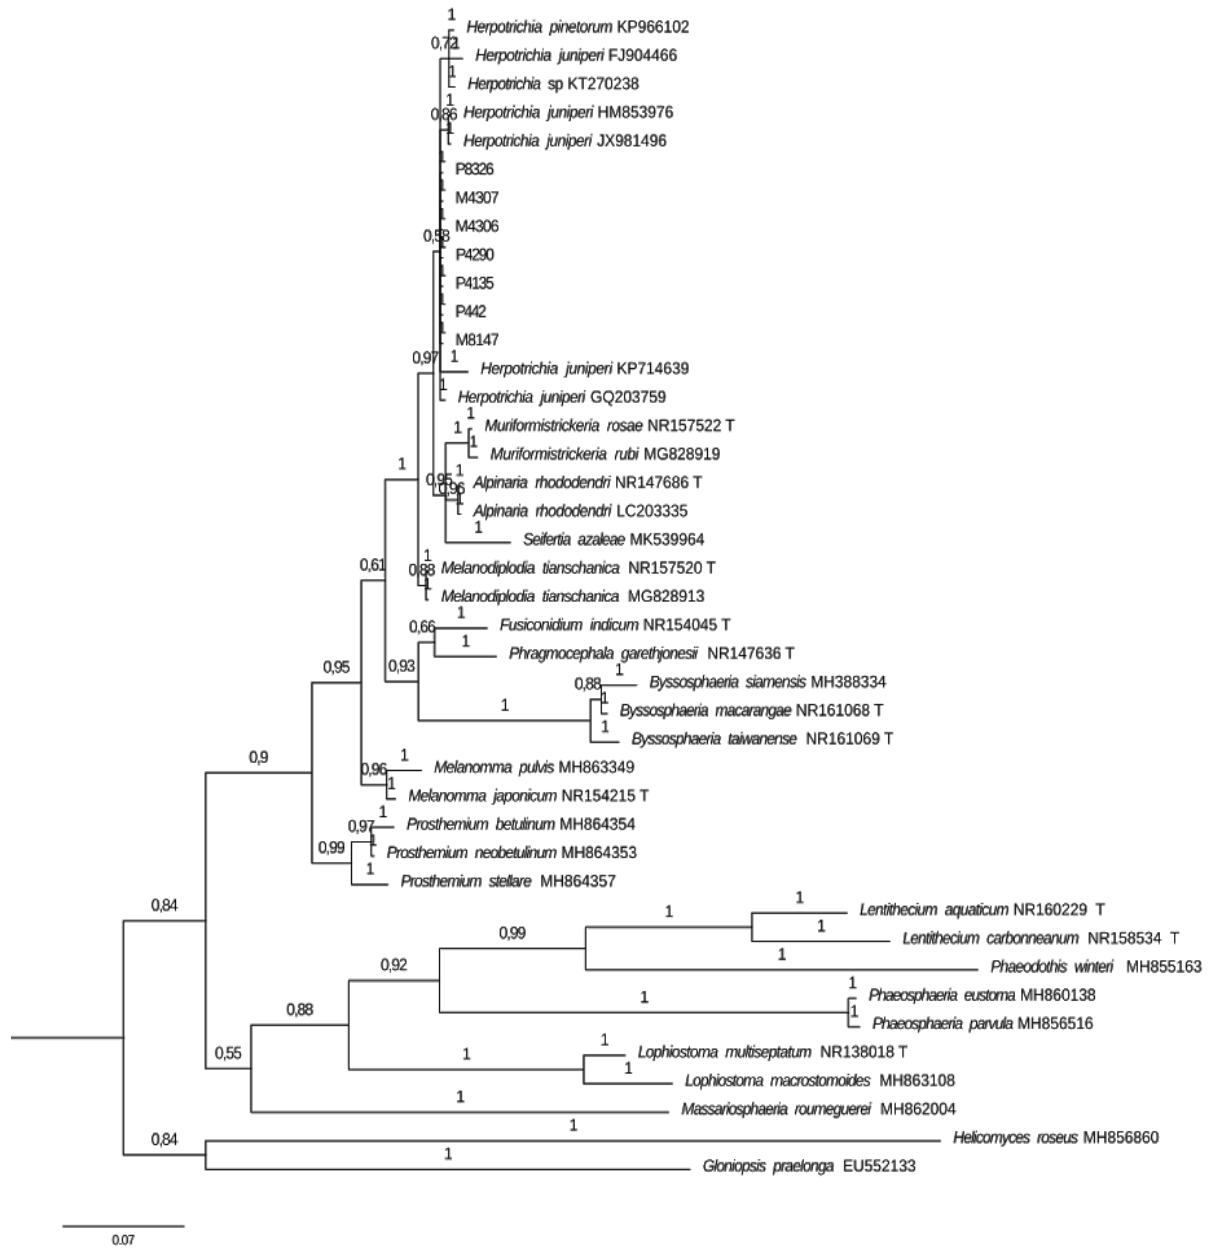

**Figure S2.** Phylogenetic analysis of *Herpotrichia* species isolated in this study, with sequences of the closest species deposited in GenBank. The tree was built based on the ITS region sequences using Bayesian Inference.

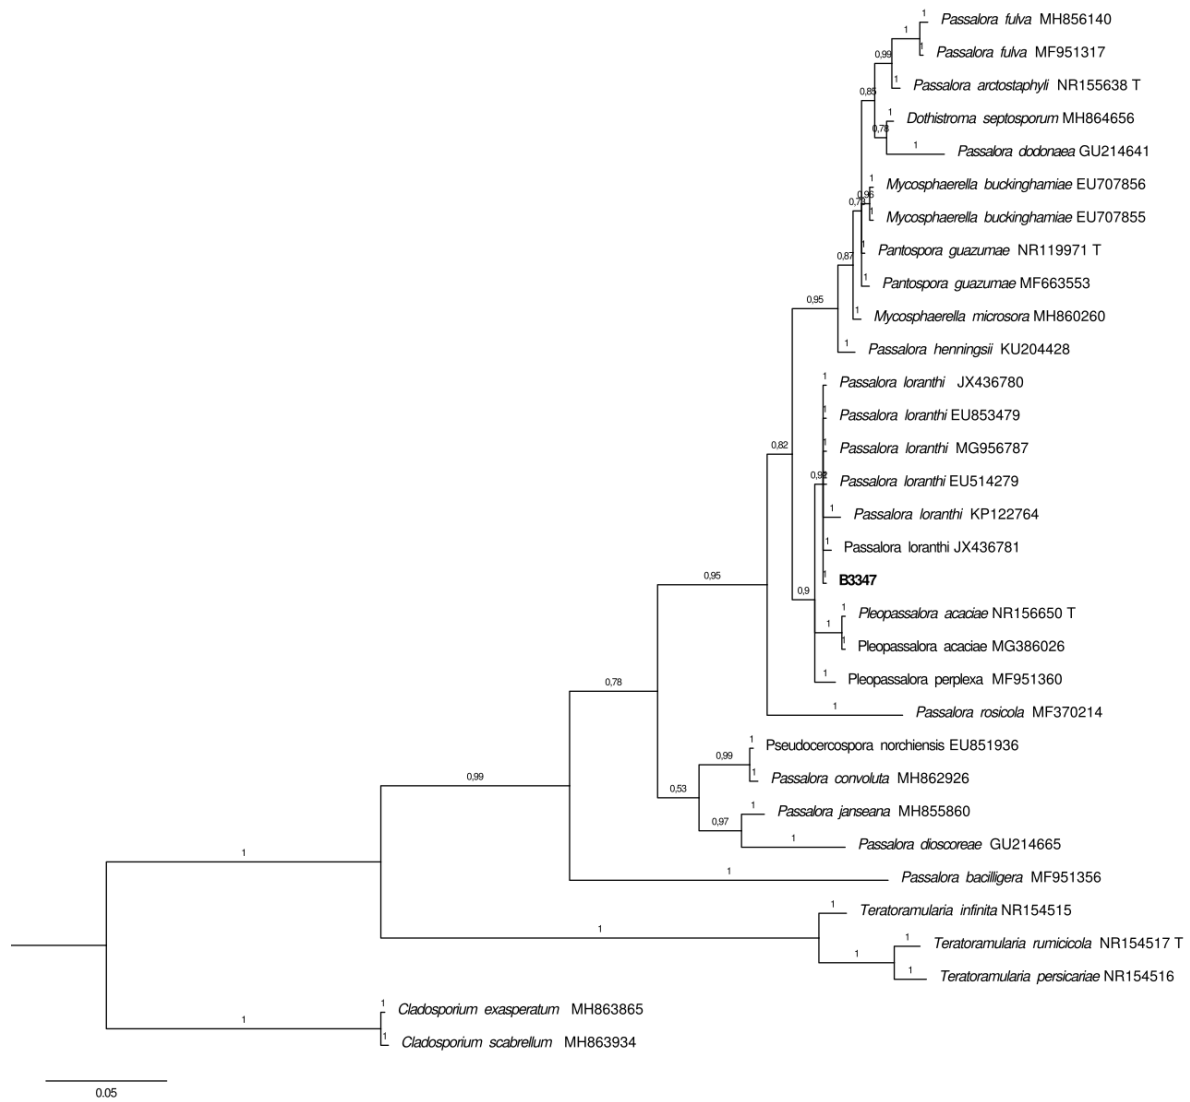

**Figure S3.** Phylogenetic analysis of *Passalora* species isolated in this study, with sequences of the closest species deposited in GenBank. The tree was built based on the ITS region sequences using Bayesian Inference.

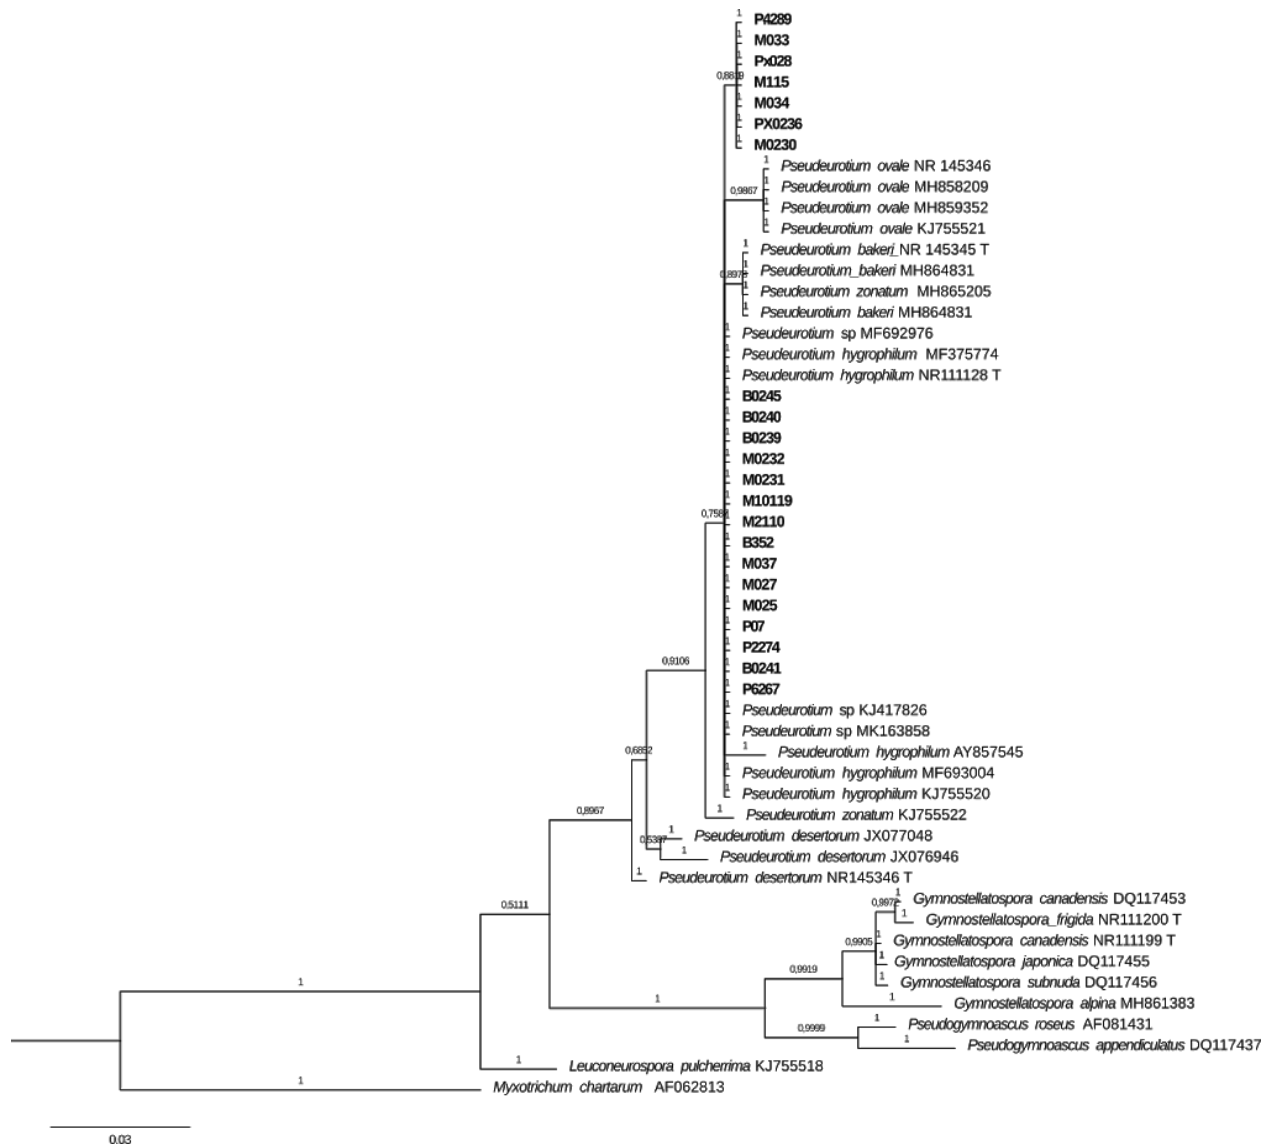

**Figure S4.** Phylogenetic analysis of *Pseudeurotium* species isolated in this study, with sequences of the closest species deposited in GenBank. The tree was built based on the ITS region sequences using Bayesian Inference.



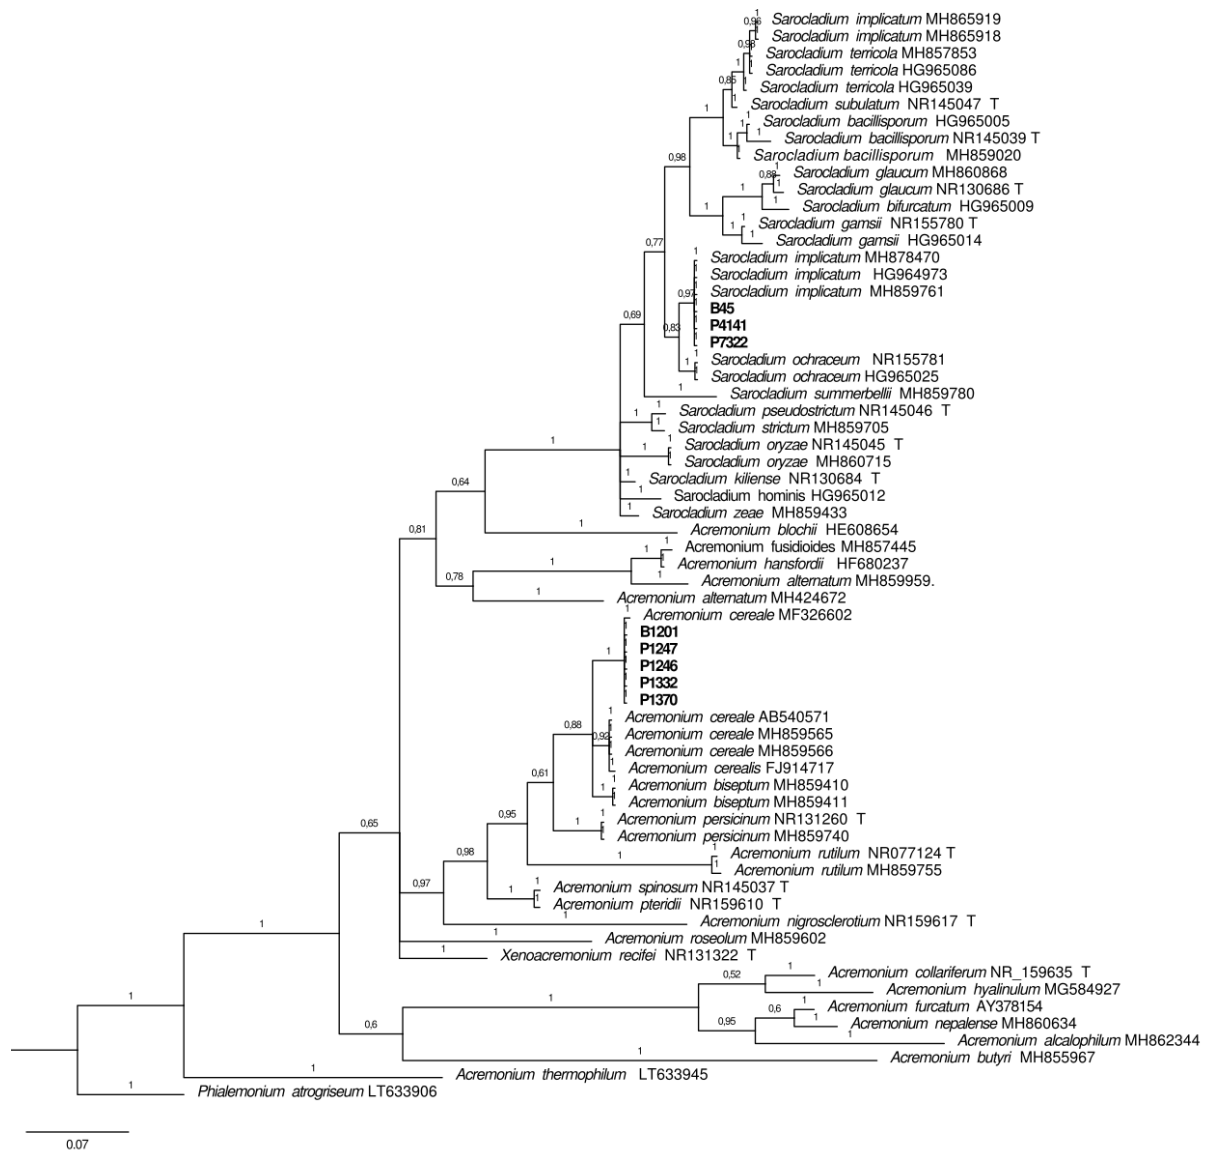

**Figure S5.** Phylogenetic analysis of *Sarocladium* and *Acremonium* species isolated in this study, with sequences of the closest species deposited in GenBank. The tree was built based on the ITS region sequences using Bayesian Inference.

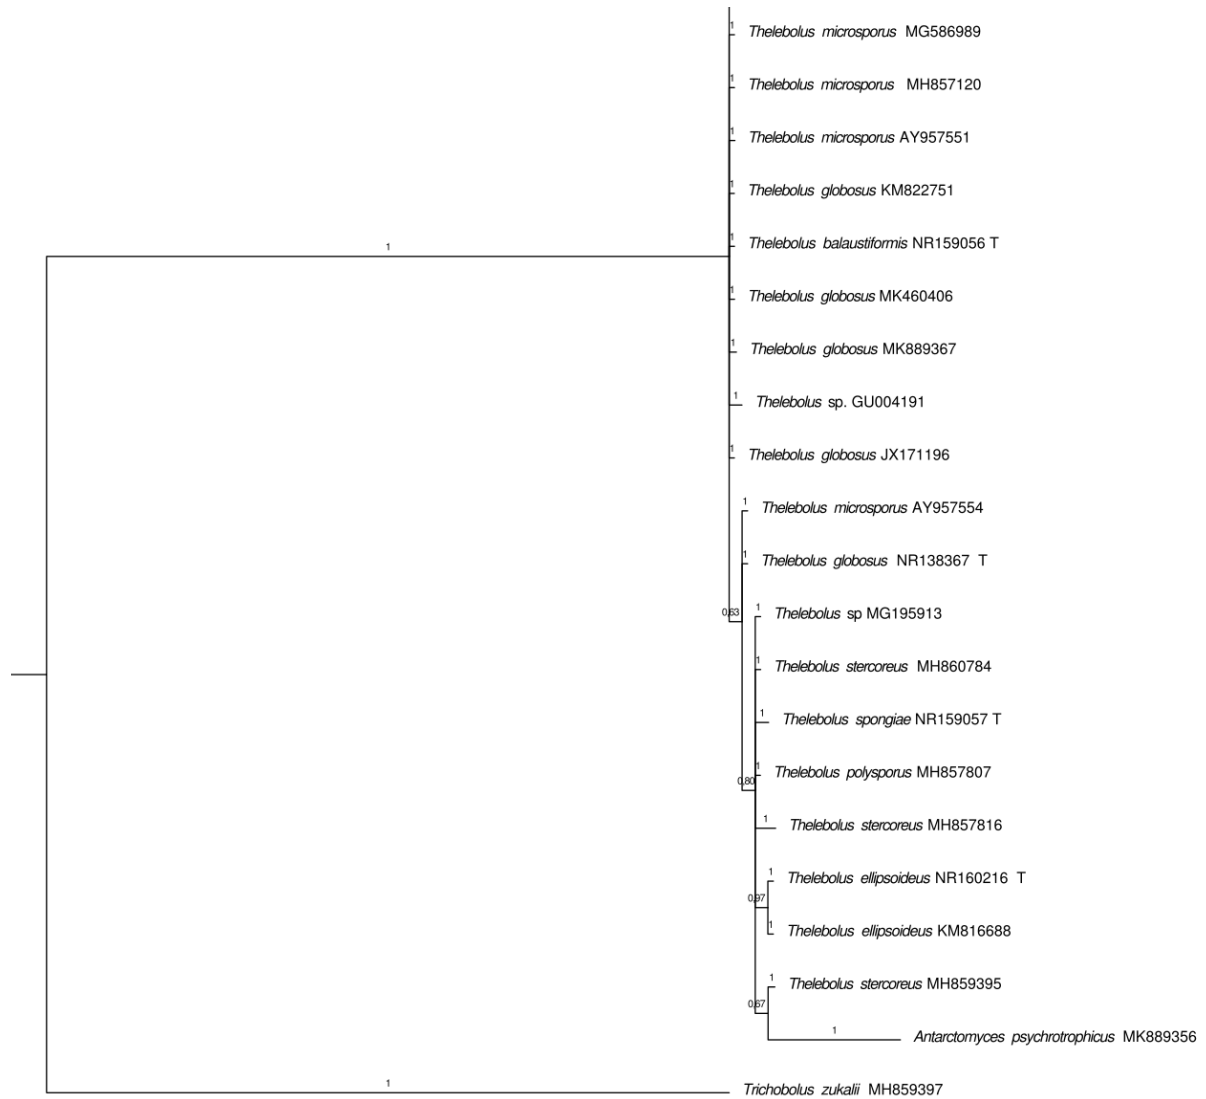

**Figure S6.** Phylogenetic analysis of *Thelebolus* species isolated in this study, with sequences of the closest species deposited in GenBank. The tree was built based on the ITS region sequences using Bayesian Inference.

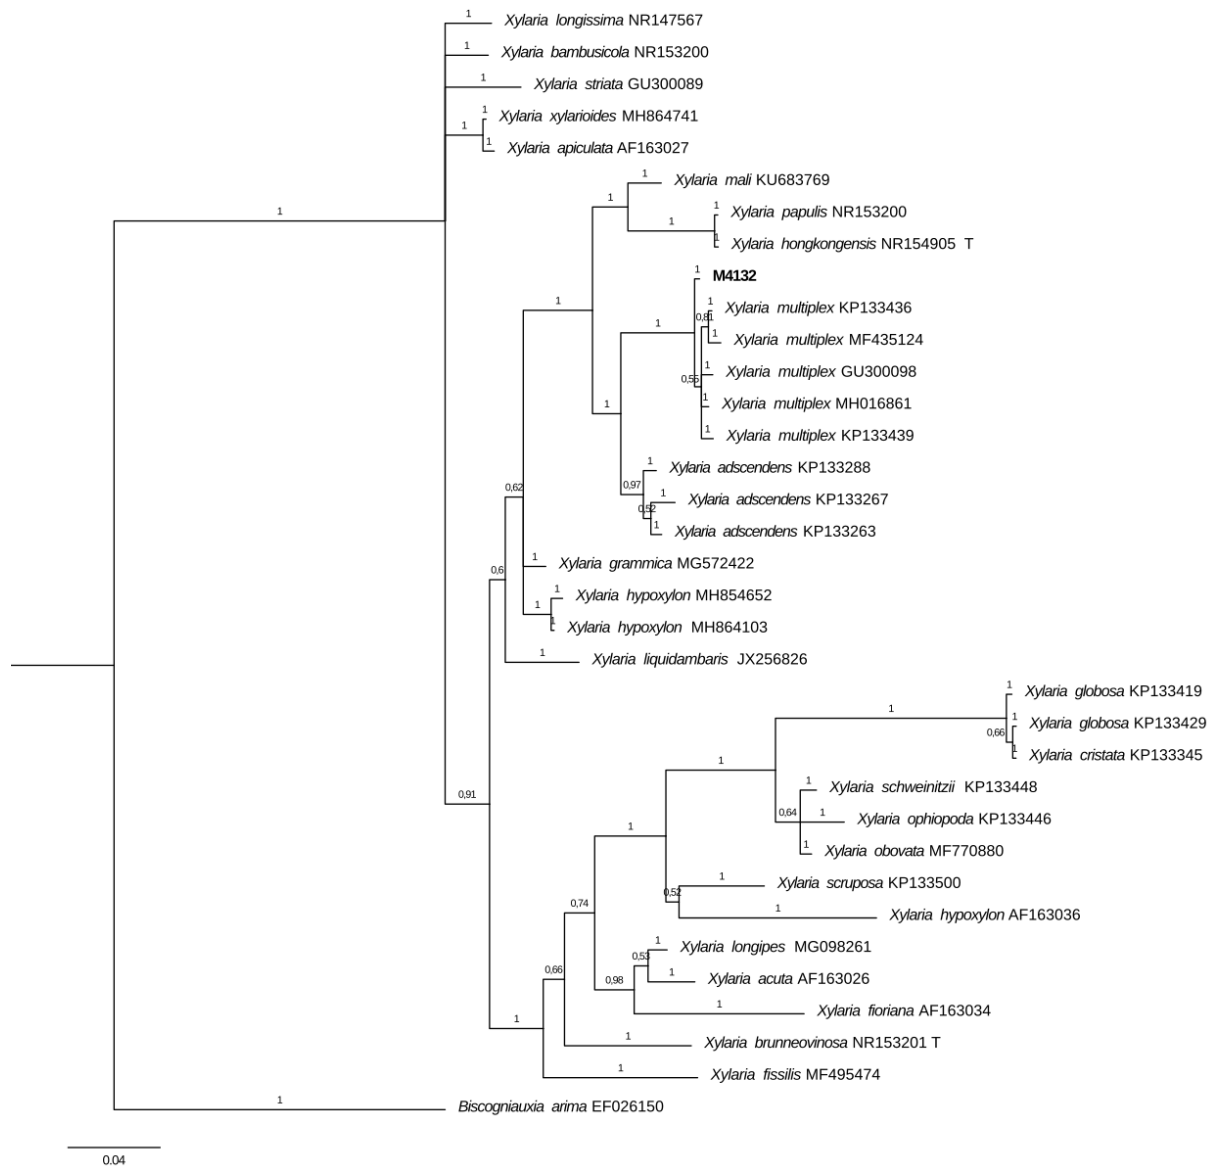

**Figure S7.** Phylogenetic analysis of *Xylaria* species isolated in this study, with sequences of the closest species deposited in GenBank. The tree was built based on the ITS region sequences using Bayesian Inference.

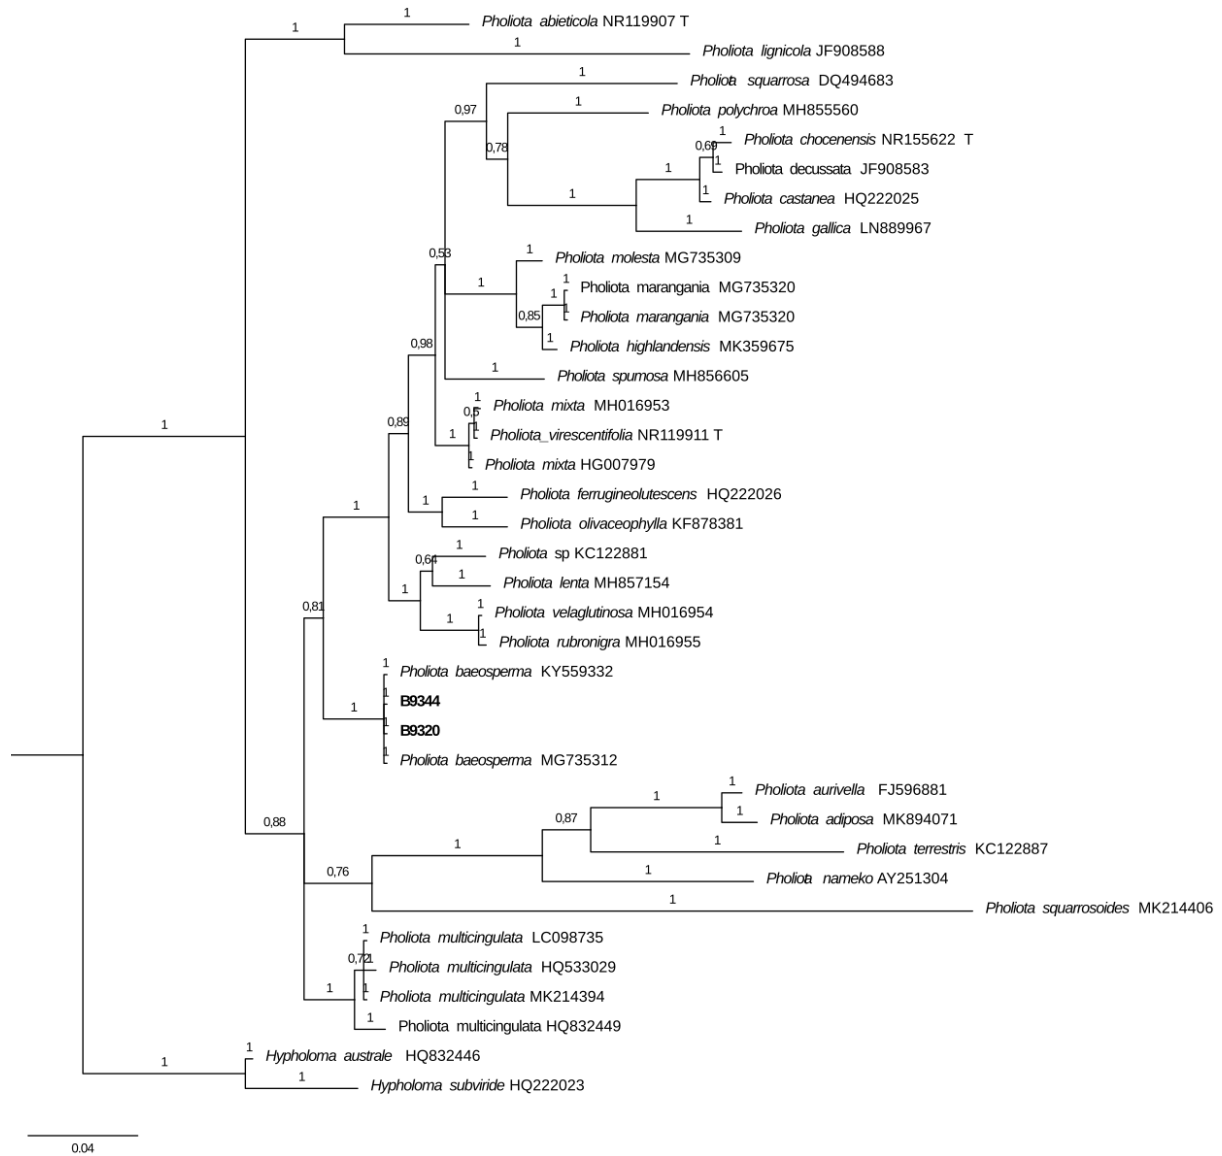

**Figure S8.** Phylogenetic analysis of *Pholiota* species isolated in this study, with sequences of the closest species deposited in GenBank. The tree was built based on the ITS region sequences using Bayesian Inference.

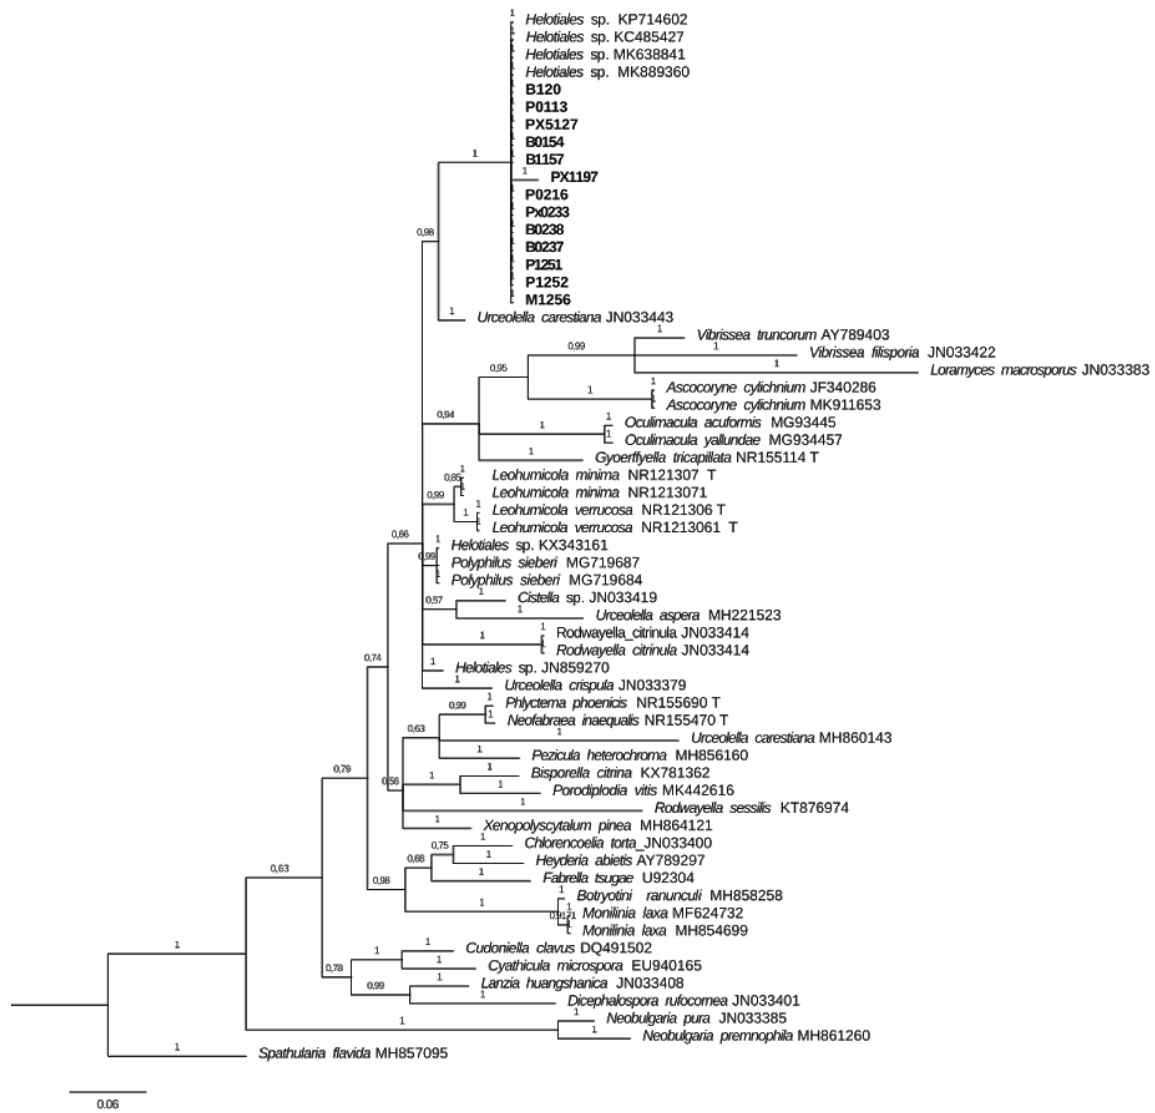

**Figure S9.** Phylogenetic analysis of *Helotiales* order isolated in this study, with sequences of the closest species deposited in GenBank. The tree was built based on the ITS region sequences using Bayesian Inference

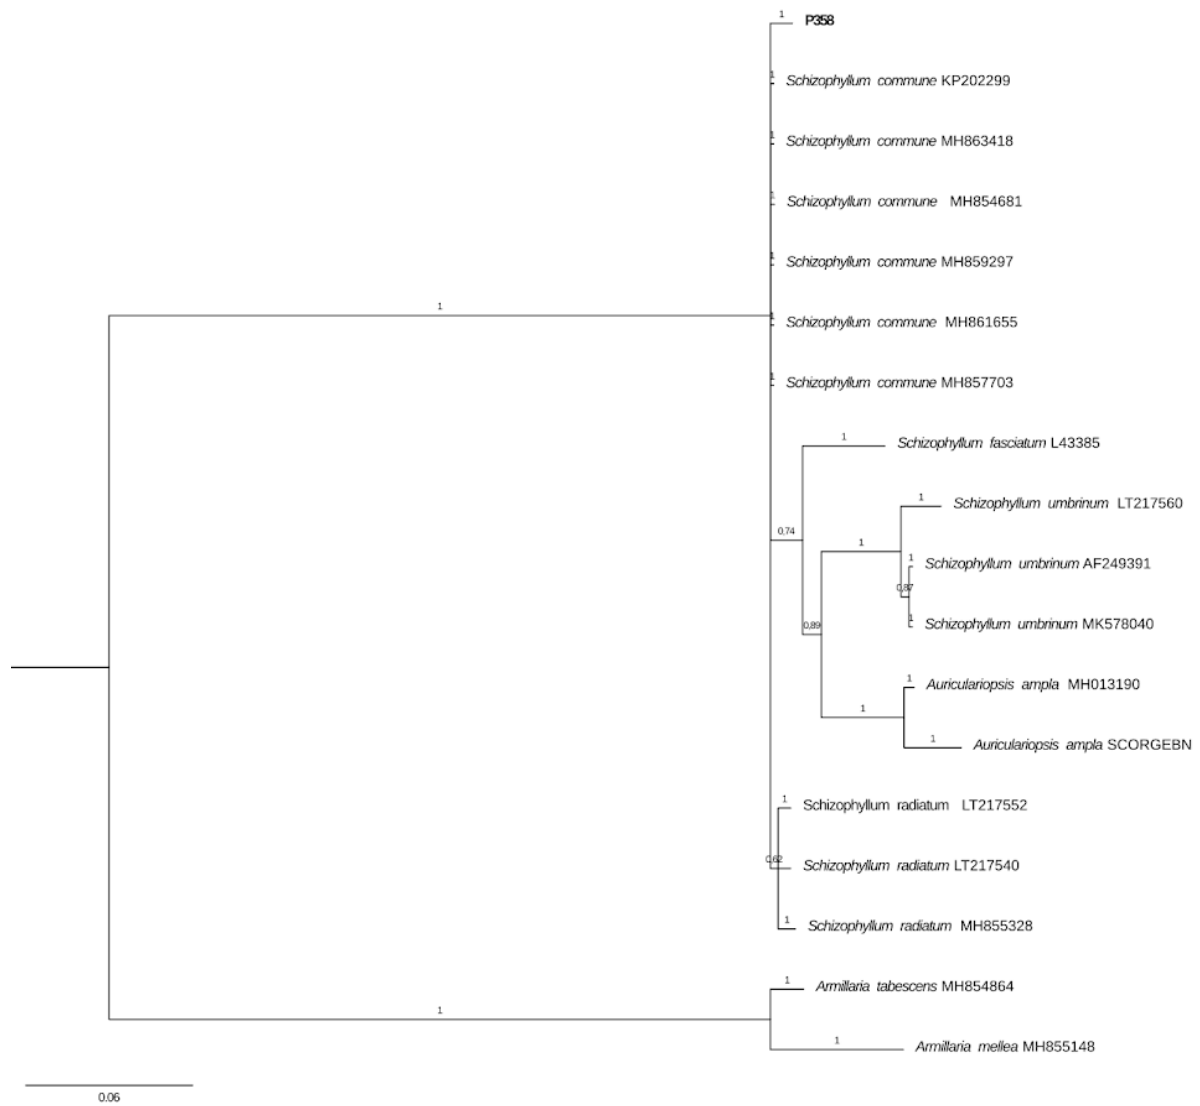

**Figure S10.** Phylogenetic analysis of *Schizophyllum* species isolated in this study, with sequences of the closest species deposited in GenBank. The tree was built based on the ITS region sequences using Bayesian Inference.

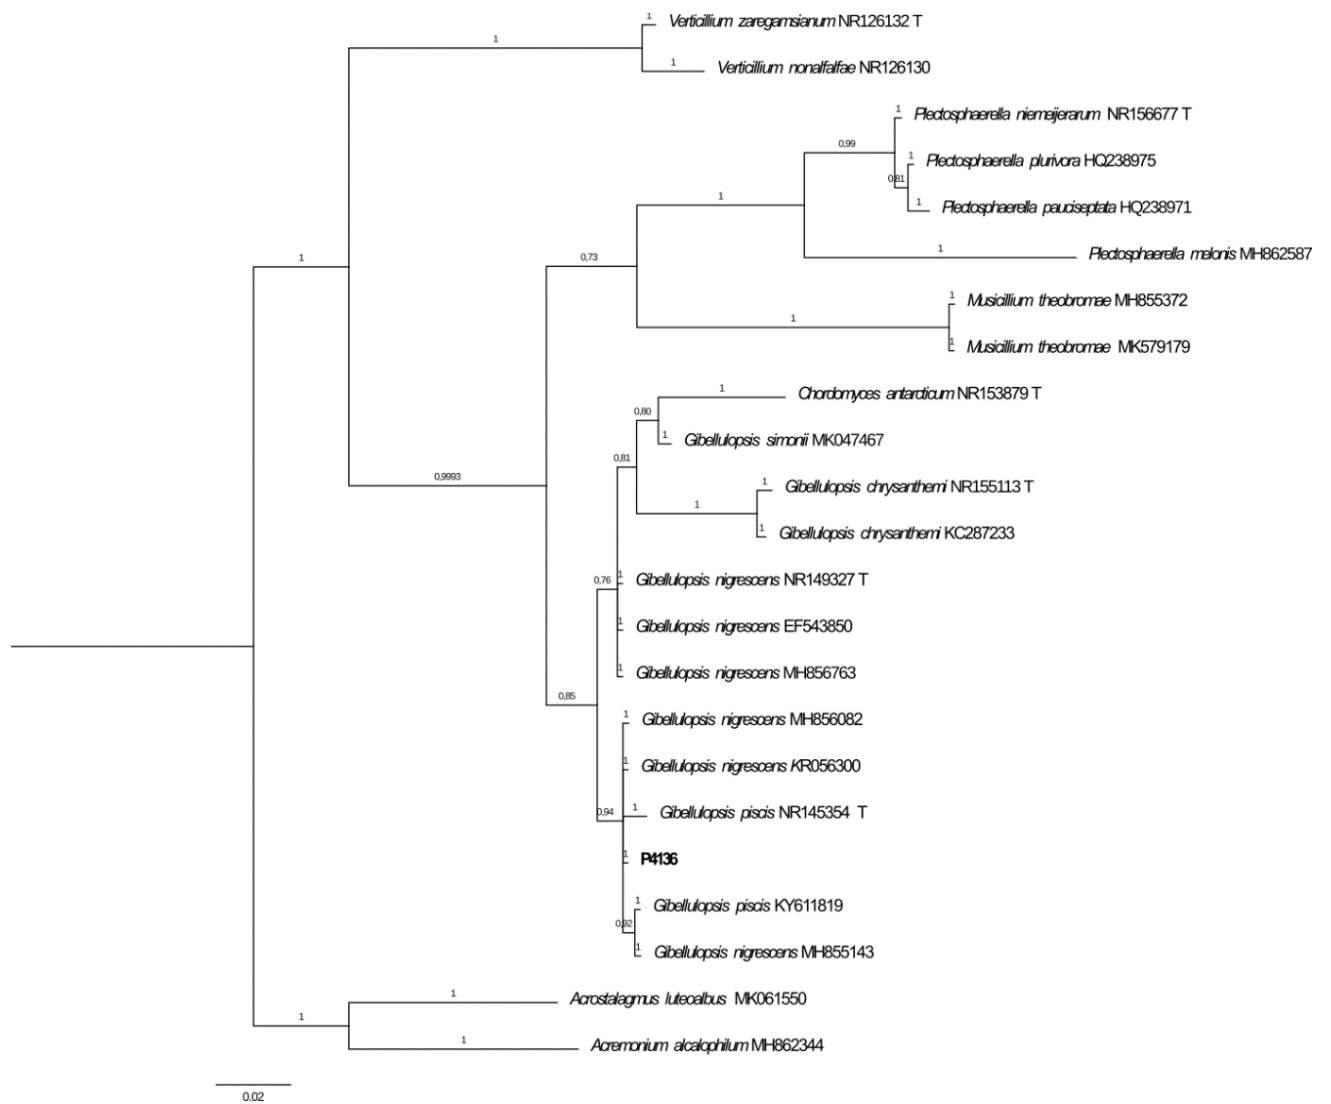

**Figure S11.** Phylogenetic analysis of *Gibellulopsis* species isolated in this study, with sequences of the closest species deposited in GenBank. The tree was built based on the ITS region sequences using Bayesian Inference.

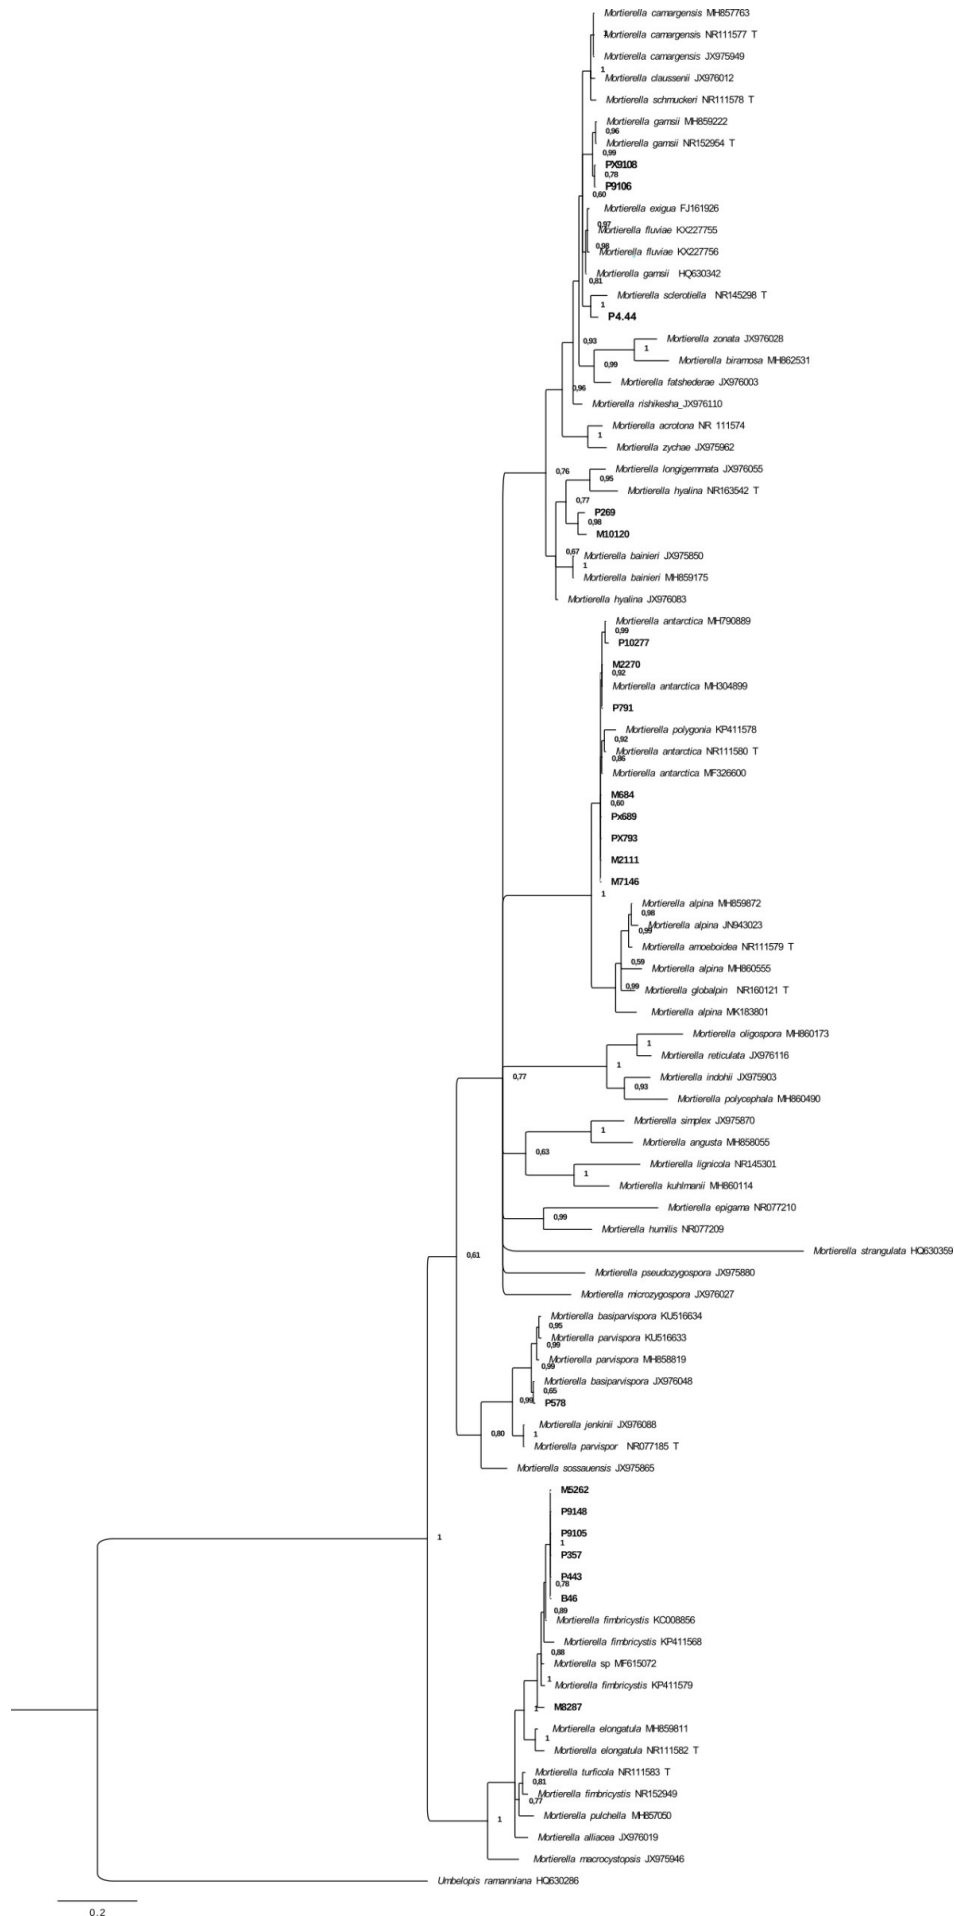

**Figure S12.** Phylogenetic analysis of *Mortierella* species isolated in this study, with sequences of the closest species deposited in GenBank. The tree was built based on the ITS region sequences using Bayesian Inference.



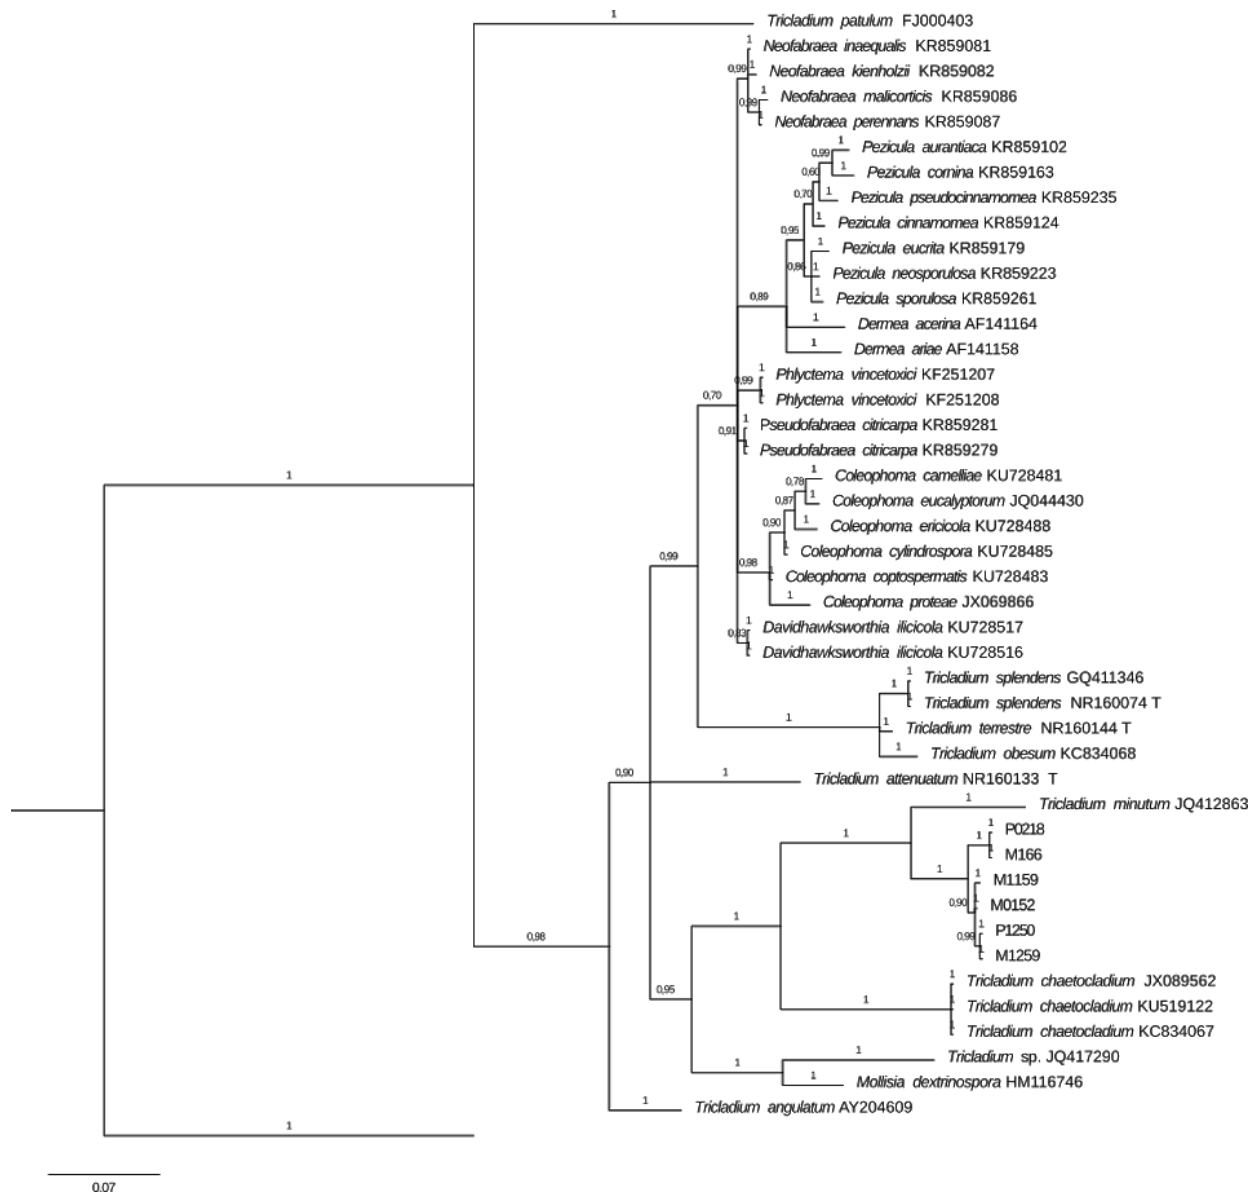

**Figure S13.** Phylogenetic analysis of *Tricladium* species isolated in this study, with sequences of the closest species deposited in GenBank. The tree was built based on the ITS region sequences using Bayesian Inference.

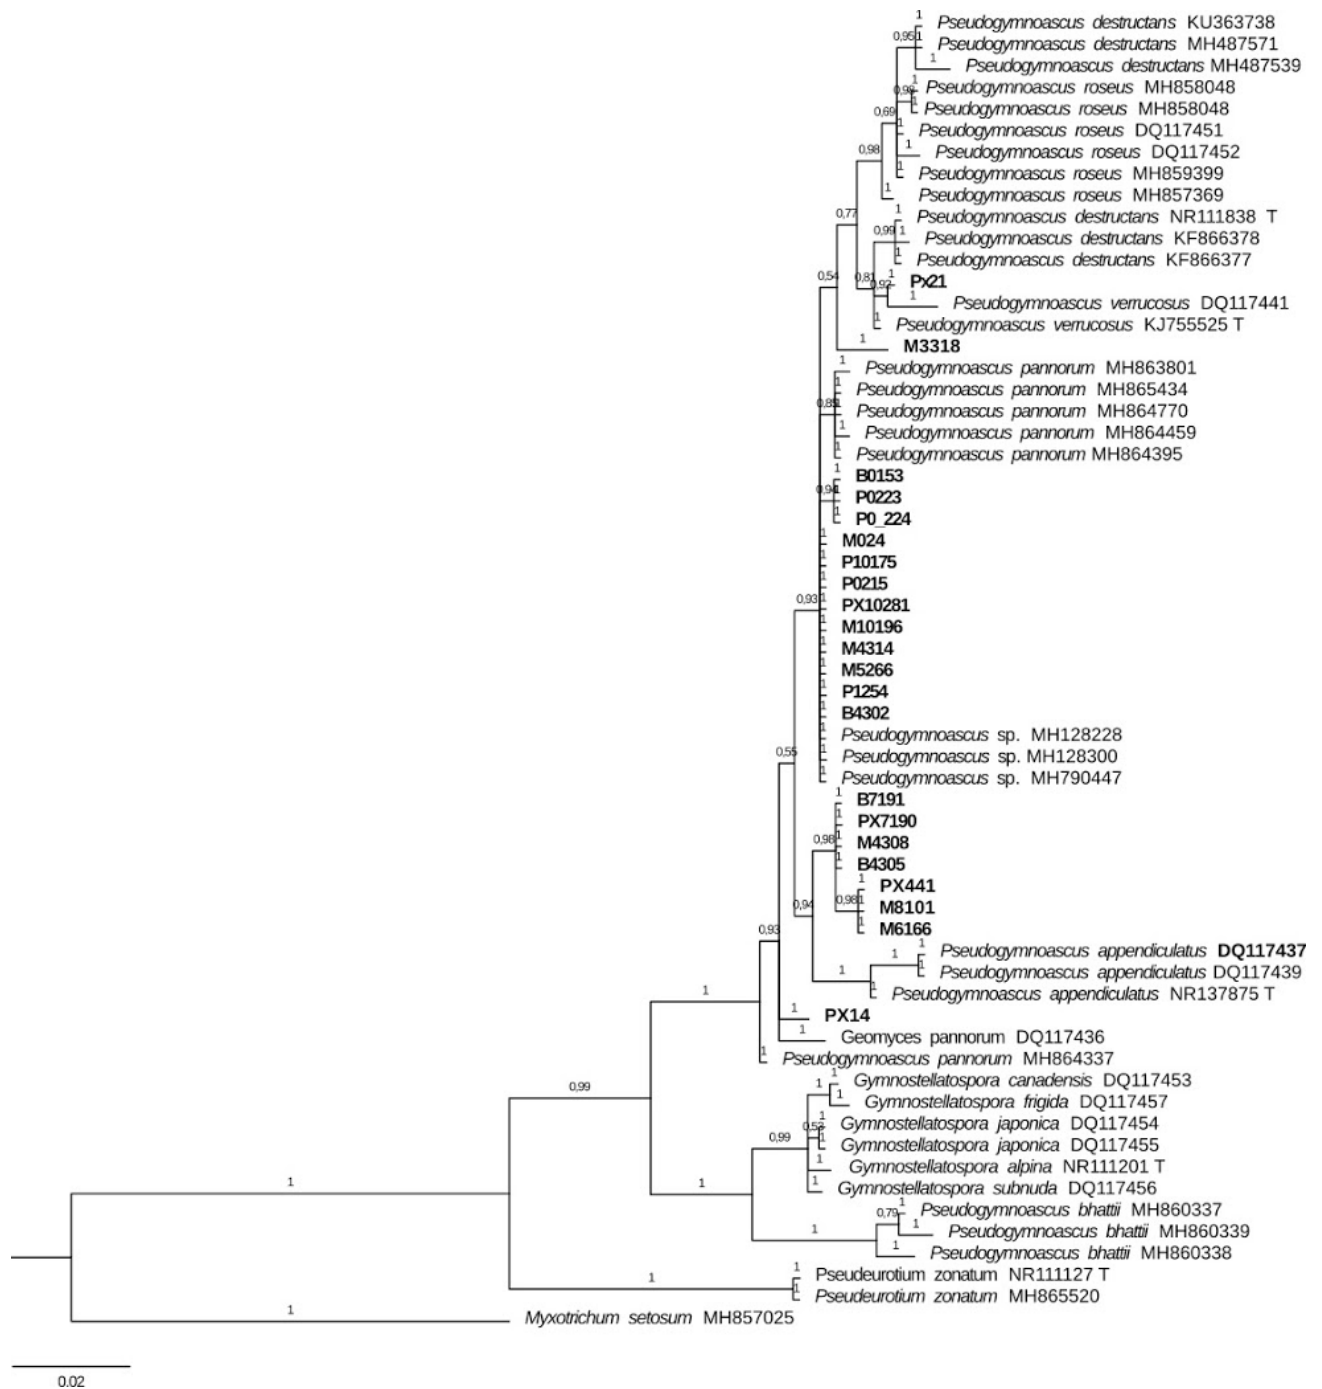

**Figure S14.** Phylogenetic analysis of *Pseudogymnoascus* species isolated in this study, with sequences of the closest species deposited in GenBank. The tree was built based on the ITS region sequences using Bayesian Inference.

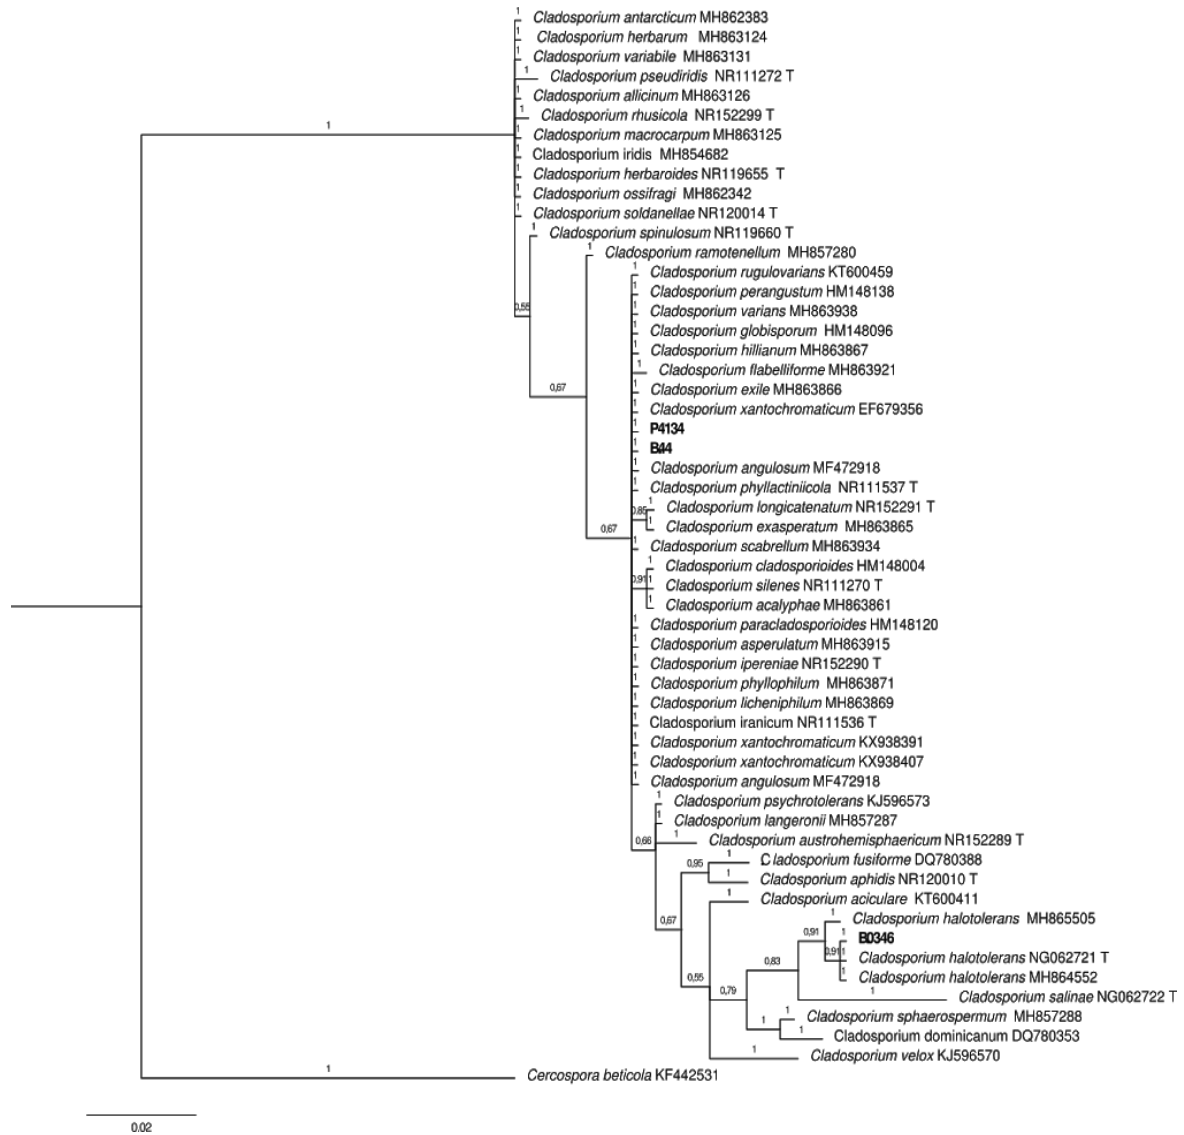

**Figure S15.** Phylogenetic analysis of *Cladosporium* species isolated in this study, with sequences of the closest species deposited in GenBank. The tree was built based on the ITS region sequences using Bayesian Inference.
